# Supplementary material for: Mouse let-7 miRNA populations exhibit RNA editing that is constrained in the 5′-seed/ cleavage/anchor regions and stabilize predicted mmu-let-7a:mRNA duplexes
Source: HighWire-hosted journal article supplement (doi:10.1101/gr.078246.108), 2008-07-09

**Supplemental Figure S5: Distribution of Nucleotide Modifications in relation to type.** This figure shows the detailed distribution of base substitutions, insertions and deletions. Results for E14.5, bTC-3 and ovary are shown in green, red and blue respectively. Results are outlined in detail in Supplemental Tables ST6-St8.

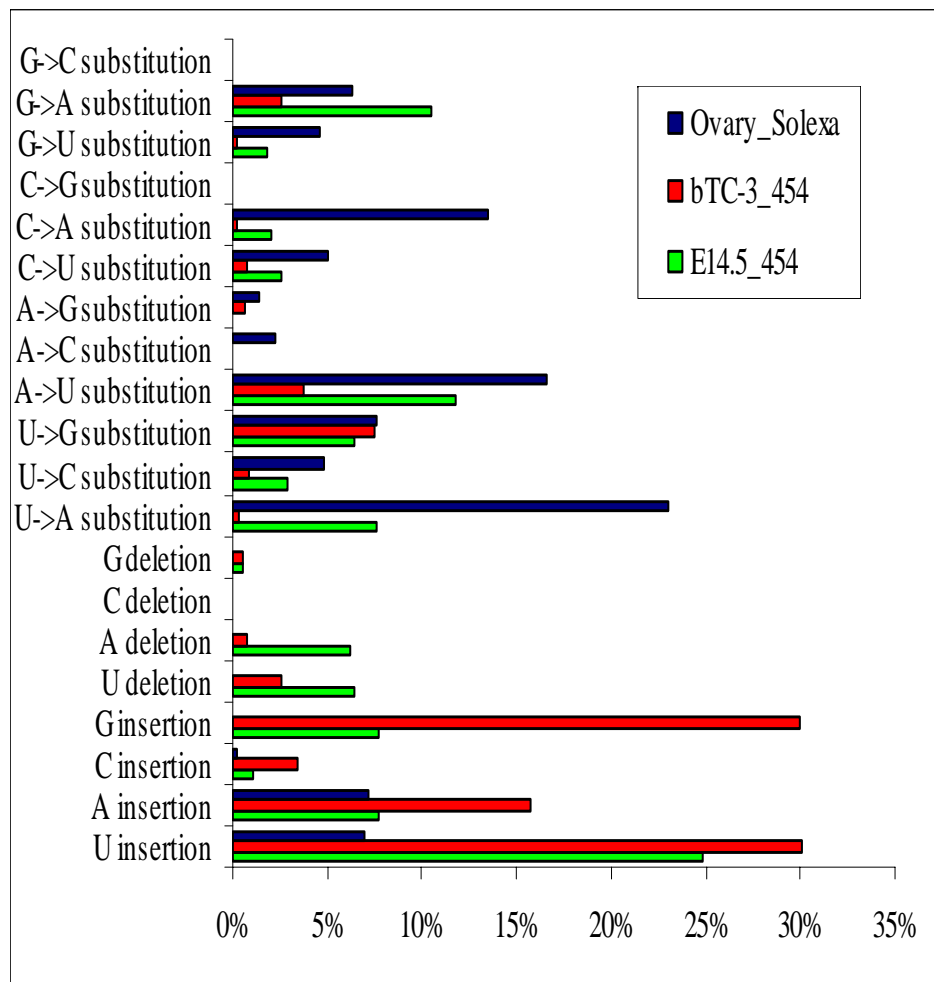

Supplement: Supplemental_Figure_S5_Compatibility_Mode.pdf [file Supplemental_Figure_S5_Compatibility_Mode.pdf]
